# Supplementary material for: Robust uncertainty quantification of the volume of tsunami ionospheric holes for the 2011 Tohoku-Oki earthquake: towards low-cost satellite-based tsunami warning systems
Source: Copernicus journal article supplement (doi:10.5194/nhess-22-849-2022), 2022-03-15
Supplement: Supplementary file [file nhess-22-849-2022-supplement-title-page.pdf › nhess-22-849-2022-supplement-title-page.pdf]

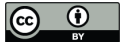

## *Supplement of*

# **Robust uncertainty quantification of the volume of tsunami ionospheric holes for the 2011 Tohoku-Oki earthquake: towards low-cost satellite-based tsunami warning systems**

**Ryuichi Kanai et al.**

*Correspondence to:* Ryuichi Kanai ([ryuichi.kanai.16@ucl.ac.uk](mailto:ryuichi.kanai.16@ucl.ac.uk))

- [nhess-22-849-2022-supplement-title-page.pdf](#)
- [.DS\\_Store](#)
- [Supplement01.mp4](#)
- [Supplement02.mp4](#)
- [Supplement03.mp4](#)
- [Supplement04.mp4](#)
- [Supplement05.mp4](#)
- [Supplement06.mp4](#)
- [Supplement07.mp4](#)
- [Supplement08.mp4](#)
- [Supplement09.mp4](#)
- [Supplement10.mp4](#)

The copyright of individual parts of the supplement might differ from the article licence.
